# Supplementary material for: Global projections of future cropland expansion to 2050 and direct impacts on biodiversity and carbon storage
Source: PubMed Central journal article supplement (PMC6282572; doi:10.1111/gcb.14459), 2018-10-24
Supplement: GCB-24-5895-s001.pdf [file GCB-24-5895-s001.pdf]

## Supporting information

**Table S1-** Count of species per country and percentage of cropland expansion effecting AZE sites

| Count of species                  | <25        | 25-50     | 50-75    | >75 | Grand Total |
|-----------------------------------|------------|-----------|----------|-----|-------------|
| <b>Africa</b>                     | <b>92</b>  | <b>8</b>  | <b>3</b> |     | <b>93</b>   |
| Angola                            | 2          |           |          |     | 2           |
| Cameroon                          | 18         | 1         |          |     | 18          |
| Congo, The Democratic Republic of | 5          |           | 3        |     | 5           |
| Cote d'Ivoire                     | 2          |           |          |     | 2           |
| Cote d'Ivoire, Guinea, Liberia    | 3          |           |          |     | 3           |
| Ethiopia                          | 9          |           |          |     | 9           |
| Kenya                             | 2          | 1         |          |     | 3           |
| Madagascar                        | 20         |           |          |     | 20          |
| Malawi                            | 2          |           |          |     | 2           |
| R <sup>+</sup> union (to France)  | 2          |           |          |     | 2           |
| Rwanda                            | 1          |           |          |     | 1           |
| Somalia                           | 1          |           |          |     | 1           |
| South Africa                      | 1          |           |          |     | 1           |
| Tanzania, United Republic of      | 21         | 6         |          |     | 21          |
| Uganda                            | 1          |           |          |     | 1           |
| Uganda, Kenya                     | 2          |           |          |     | 2           |
| <b>Asia</b>                       | <b>51</b>  | <b>6</b>  | <b>1</b> |     | <b>55</b>   |
| Afghanistan                       | 1          |           |          |     | 1           |
| Armenia                           | 1          |           |          |     | 1           |
| China                             | 6          | 2         | 1        |     | 8           |
| India                             | 10         | 2         |          |     | 12          |
| Indonesia                         | 17         | 2         |          |     | 17          |
| Japan                             | 3          |           |          |     | 3           |
| Myanmar                           | 1          |           |          |     | 1           |
| Philippines                       | 2          |           |          |     | 2           |
| Sri Lanka                         | 10         |           |          |     | 10          |
| Vietnam                           | 1          |           |          |     | 1           |
| <b>Europe</b>                     | <b>1</b>   |           |          |     | <b>1</b>    |
| Turkey                            | 1          |           |          |     | 1           |
| <b>North America</b>              | <b>145</b> | <b>29</b> |          |     | <b>155</b>  |
| Costa Rica                        | 1          |           |          |     | 1           |
| Cuba                              | 10         |           |          |     | 10          |
| Guatemala                         | 9          |           |          |     | 9           |
| Honduras                          | 12         |           |          |     | 12          |
| Mexico                            | 106        | 24        |          |     | 111         |
| Panama                            | 1          |           |          |     | 1           |
| Trinidad and Tobago               | 2          |           |          |     | 2           |
| United States of America          | 4          | 5         |          |     | 9           |

|                      |            |           |          |          |            |
|----------------------|------------|-----------|----------|----------|------------|
| <b>Oceania</b>       | <b>16</b>  | <b>3</b>  |          | <b>1</b> | <b>16</b>  |
| Australia            | 7          | 3         |          | 1        | 7          |
| Fiji                 | 1          |           |          |          | 1          |
| New Caledonia        | 4          |           |          |          | 4          |
| New Zealand          | 2          |           |          |          | 2          |
| Papua New Guinea     | 1          |           |          |          | 1          |
| Samoa                | 1          |           |          |          | 1          |
| <b>South America</b> | <b>134</b> | <b>15</b> |          |          | <b>135</b> |
| Argentina            | 5          |           |          |          | 5          |
| Bolivia              | 7          |           |          |          | 7          |
| Brazil               | 7          | 1         |          |          | 7          |
| Chile                | 3          |           |          |          | 3          |
| Colombia             | 36         | 13        |          |          | 36         |
| Colombia, Venezuela  | 2          |           |          |          | 2          |
| Ecuador              | 22         |           |          |          | 22         |
| Peru                 | 29         |           |          |          | 29         |
| Venezuela            | 23         | 1         |          |          | 24         |
| <b>Grand Total</b>   | <b>439</b> | <b>61</b> | <b>4</b> | <b>1</b> | <b>455</b> |

*\*Totals do not always sum each row as each species may be affected by more than one area of cropland expansion*
